# Supplementary material for: Preparation of a Lactobacillus rhamnosus ATCC 7469 microencapsulated-lactulose synbiotic and its effect on equol production
Source: Royal Society of Chemistry journal article supplement (doi:10.1039/d4fo02690j), 2024-01-01
Supplement: d4fo02690j1.pdf [file d4fo02690j1.pdf]

### Supplementary figure captions

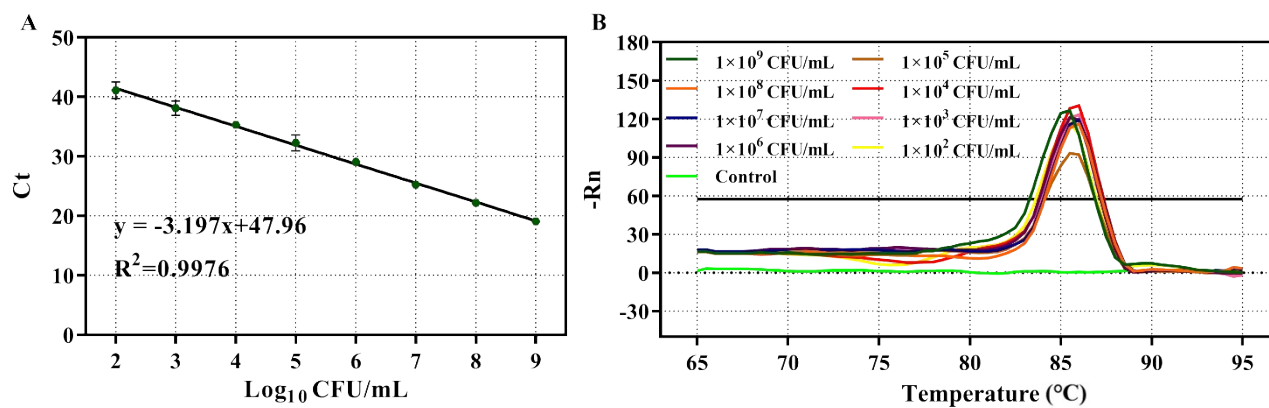

**Fig. S1.** Detection of PMAxx-qPCR for *Lactobacillus rhamnosus* ATCC 7469. Plotted values represent the mean and standard deviation obtained from three replicate tests. (A) Standard curve; (B) Melting curve analysis of qPCR products.

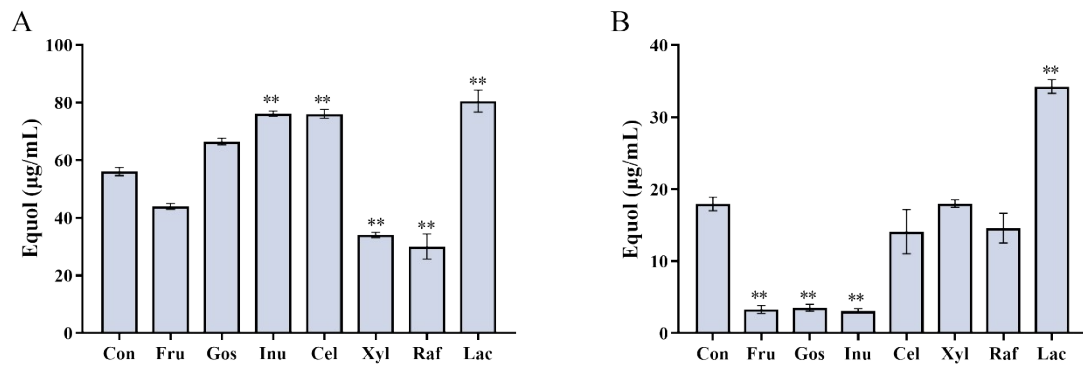

**Fig. S2.** Effects of different prebiotics on the biotransformation ability of high- and low-producing bacteria.

(A) High-producing bacteria; (B) Low-producing bacteria. Con: control group; Fru: fructooligosaccharide;

Gos: galactooligosaccharides; Inu: inulin; Cel: cellobiose; Xyl: xylitol; Raf: raffinose; Lac: lactulose. \*\*p

< 0.01 compared with the control group.

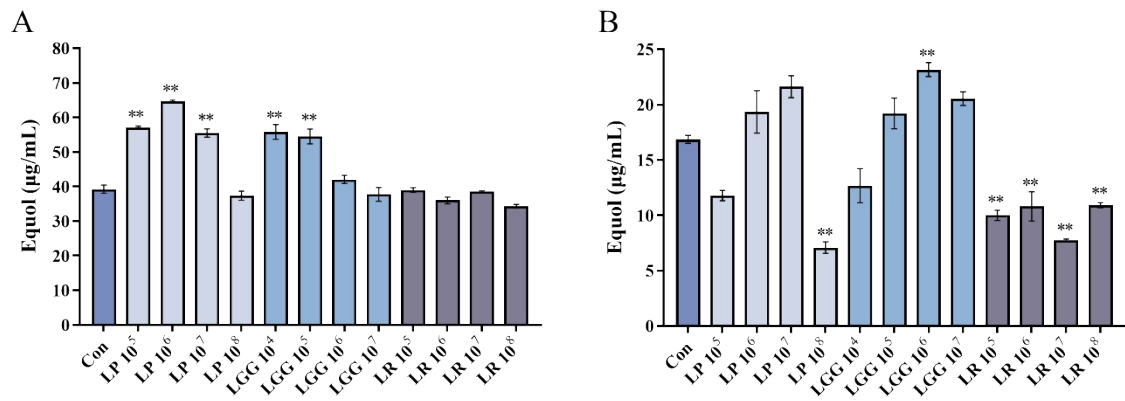

**Fig. S3.** Effects of different concentrations of three probiotics on the biotransformation ability of high- and low-producing bacteria. (A) High-producing bacteria; (B) Low-producing bacteria. LP: *Lactobacillus plantarum* ATCC 8014; LGG: *Lactobacillus rhamnosus* ATCC 7469; LR: *Lactobacillus reuteri* ATCC 23272. \*\* $p < 0.01$  compared with the control group.

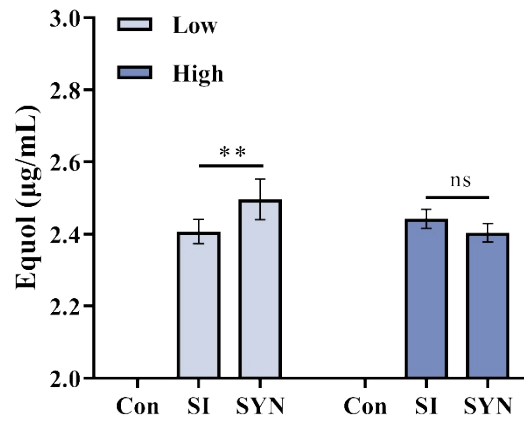

**Fig. S4.** Plasma equol concentration of HFA mice after four weeks of synbiotic preparation intervention.

Con: control group; SI: soy isoflavones group; SYN: synbiotic preparation group. \*\*p < 0.01; ns: no significance.

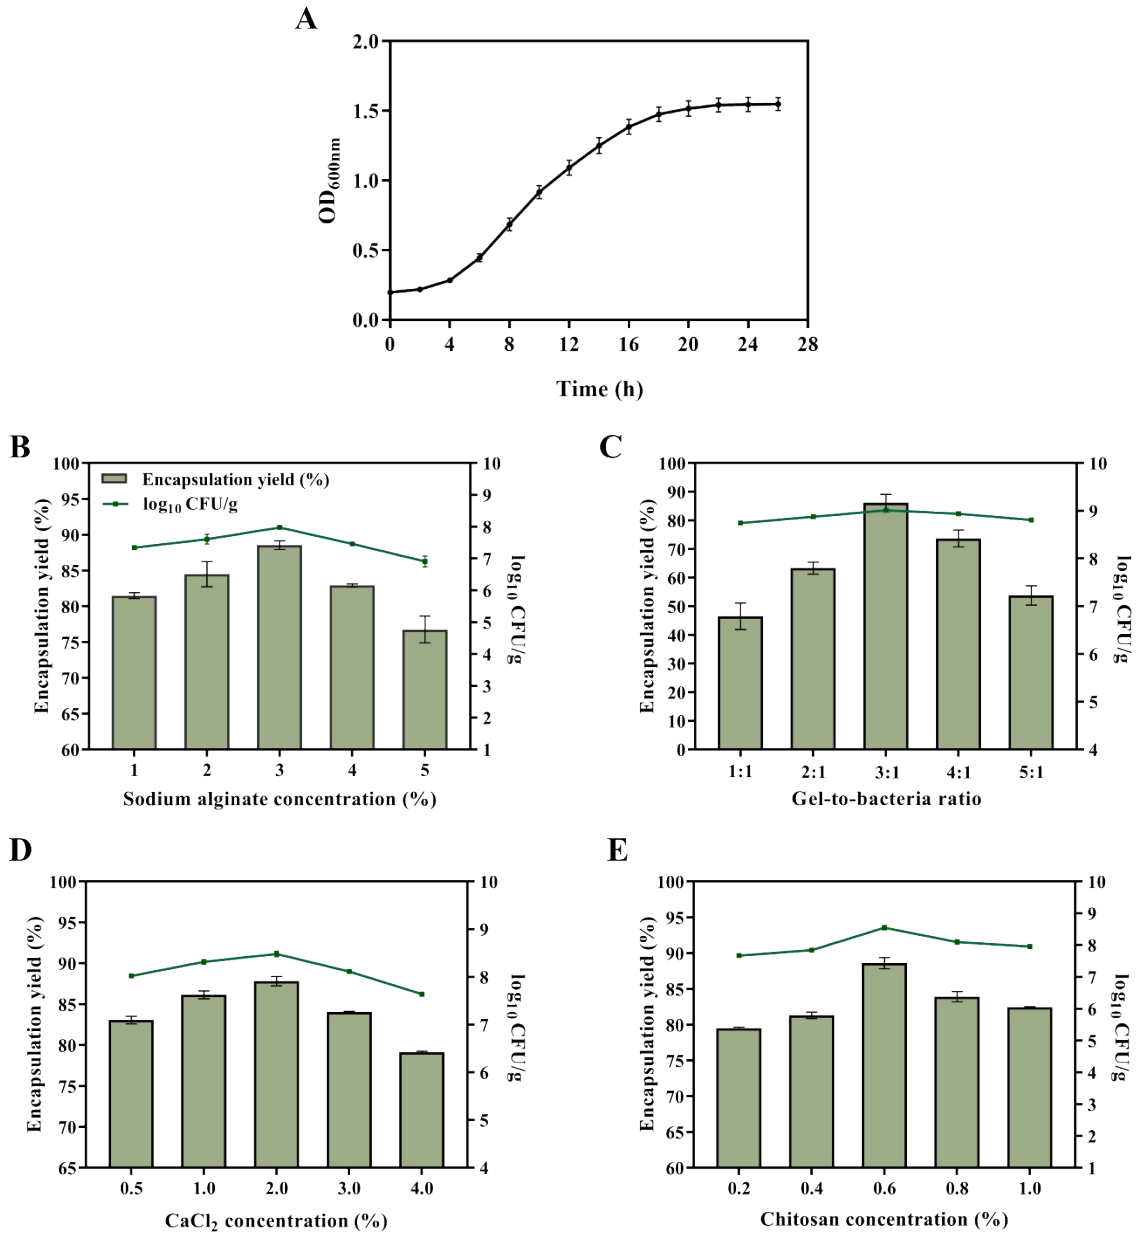

**Fig. S5.** Optimization of the microcapsule preparation process. (A) Growth curve of *Lactobacillus rhamnosus* ATCC 7469; (B) Effect of different sodium alginate concentrations on the encapsulation yield of microcapsules and the number of viable probiotics; (C) Effect of different gel-to-bacteria ratios on the encapsulation yield of microcapsules and the number of viable probiotics; (D) Effect of different CaCl<sub>2</sub> concentrations on the encapsulation yield of microcapsules and the number of viable probiotics; (E) Effect of different chitosan concentrations on the encapsulation yield of microcapsules and the number of viable probiotics.

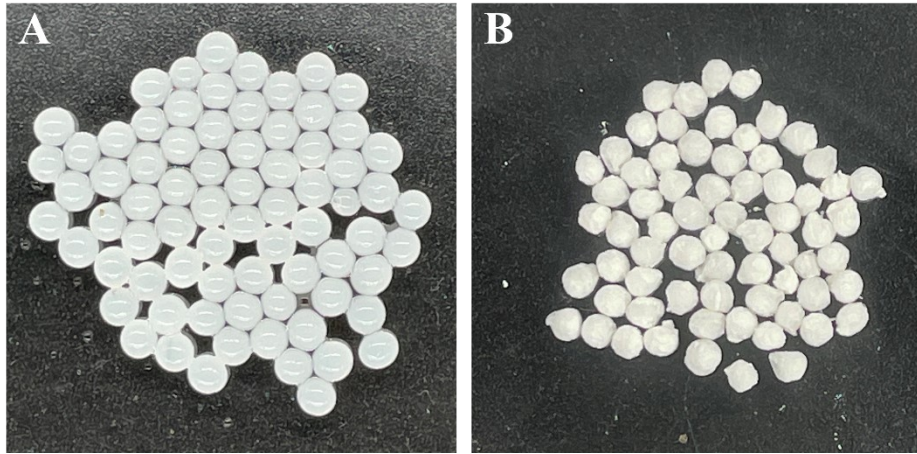

**Fig. S6.** Chitosan-coated sodium alginate microcapsules. (A) Fresh microcapsules; (B) Freeze-dried microcapsules.

## Supplementary table captions

**Table S1.** Factors and levels used in the orthogonal tests.

| Level | Variable     |               |                             |
|-------|--------------|---------------|-----------------------------|
|       | A            | B             | C                           |
|       | Daidzein (%) | Lactulose (%) | Probiotic microcapsules (g) |
| 1     | 0.015        | 1             | 0.5                         |
| 2     | 0.025        | 1.5           | 1                           |
| 3     | 0.035        | 2             | 1.5                         |

**Table S2.** Experimental design and results for response surface analysis.

| Run | A<br>Sodium alginate<br>concentration | B<br>Gel-to-bacteria<br>ratio | C<br>CaCl <sub>2</sub><br>concentration | D<br>Chitosan<br>concentration | Encapsulation<br>yield (%) |
|-----|---------------------------------------|-------------------------------|-----------------------------------------|--------------------------------|----------------------------|
| 1   | 0                                     | -1                            | 0                                       | 1                              | 72.24 ± 0.03               |
| 2   | 0                                     | 0                             | 0                                       | 0                              | 93.50 ± 0.12               |
| 3   | 1                                     | 0                             | 0                                       | 1                              | 90.83 ± 0.01               |
| 4   | 0                                     | 0                             | 0                                       | 0                              | 93.10 ± 0.25               |
| 5   | 0                                     | 1                             | 1                                       | 0                              | 92.30 ± 0.40               |
| 6   | -1                                    | 0                             | -1                                      | 0                              | 90.50 ± 0.41               |
| 7   | 0                                     | -1                            | -1                                      | 0                              | 90.92 ± 0.01               |
| 8   | 0                                     | 1                             | 0                                       | 1                              | 75.21 ± 0.02               |
| 9   | 0                                     | -1                            | 1                                       | 0                              | 72.00 ± 0.12               |
| 10  | 1                                     | 0                             | 0                                       | -1                             | 72.42 ± 0.57               |
| 11  | 0                                     | -1                            | 0                                       | -1                             | 74.69 ± 0.21               |
| 12  | 0                                     | 0                             | 0                                       | 0                              | 92.90 ± 0.14               |
| 13  | 0                                     | 0                             | 1                                       | -1                             | 85.28 ± 0.39               |
| 14  | 0                                     | 1                             | 0                                       | -1                             | 68.47 ± 0.05               |
| 15  | -1                                    | -1                            | 0                                       | 0                              | 76.09 ± 0.07               |
| 16  | 0                                     | 0                             | 0                                       | 0                              | 91.45 ± 0.09               |
| 17  | -1                                    | 0                             | 0                                       | 1                              | 75.35 ± 0.06               |
| 18  | 0                                     | 0                             | -1                                      | 1                              | 90.28 ± 0.17               |
| 19  | 1                                     | 0                             | 1                                       | 0                              | 92.81 ± 0.04               |
| 20  | 0                                     | 1                             | -1                                      | 0                              | 69.17 ± 0.06               |
| 21  | 1                                     | 1                             | 0                                       | 0                              | 85.22 ± 0.02               |
| 22  | -1                                    | 0                             | 0                                       | -1                             | 89.94 ± 0.09               |
| 23  | 0                                     | 0                             | -1                                      | -1                             | 74.37 ± 0.63               |
| 24  | 0                                     | 0                             | 0                                       | 0                              | 90.30 ± 0.10               |
| 25  | -1                                    | 0                             | 1                                       | 0                              | 88.31 ± 0.83               |
| 26  | 0                                     | 0                             | 1                                       | 1                              | 77.99 ± 0.08               |
| 27  | 1                                     | 0                             | -1                                      | 0                              | 91.16 ± 0.02               |
| 28  | 1                                     | -1                            | 0                                       | 0                              | 83.49 ± 0.01               |
| 29  | -1                                    | 1                             | 0                                       | 0                              | 86.43 ± 0.07               |



**Table S3.** Quadratic regression model analysis of variance.

| Source                           | Sum of squares | Df | Mean square | F-value | P-value > F |                 |
|----------------------------------|----------------|----|-------------|---------|-------------|-----------------|
| Model                            | 2026.02        | 14 | 144.72      | 32.00   | < 0.0001    | **              |
| A-sodium alginate concentration  | 7.22           | 1  | 7.22        | 1.60    | 0.2269      |                 |
| B-gel-to-bacteria ratio          | 4.53           | 1  | 4.53        | 1.00    | 0.3341      |                 |
| C-calcium chloride concentration | 0.4370         | 1  | 0.4370      | 0.0966  | 0.7605      |                 |
| D-chitosan concentration         | 23.32          | 1  | 23.32       | 5.16    | 0.0395      | *               |
| AB                               | 18.53          | 1  | 18.53       | 4.10    | 0.0424      | *               |
| AC                               | 3.69           | 1  | 3.69        | 0.8152  | 0.3819      |                 |
| AD                               | 272.25         | 1  | 272.25      | 60.20   | < 0.0001    | **              |
| BC                               | 442.05         | 1  | 442.05      | 97.75   | < 0.0001    | **              |
| BD                               | 21.11          | 1  | 21.11       | 4.67    | 0.0485      | *               |
| CD                               | 134.56         | 1  | 134.56      | 29.76   | < 0.0001    | **              |
| A <sup>2</sup>                   | 0.2616         | 1  | 0.2616      | 0.0579  | 0.8134      |                 |
| B <sup>2</sup>                   | 615.46         | 1  | 615.46      | 136.10  | < 0.0001    | **              |
| C <sup>2</sup>                   | 8.33           | 1  | 8.33        | 1.84    | 0.1962      |                 |
| D <sup>2</sup>                   | 602.27         | 1  | 602.27      | 133.18  | < 0.0001    | **              |
| Residual                         | 63.31          | 14 | 4.52        |         |             |                 |
| Lack of Fit                      | 56.16          | 10 | 5.62        | 3.14    | 0.1406      | Non Significant |
| Pure Error                       | 7.15           | 4  | 1.79        |         |             |                 |
| Cor Total                        | 2089.33        | 28 |             |         |             |                 |

[\*. Significant difference (P < 0.05); \*\*. The difference is highly significant (P < 0.01).]

**Table S4.** Model credibility analysis

| parameters | SD   | Mean  | CV%  | PRESS  | R <sup>2</sup> | Adj R <sup>2</sup> | Pred R <sup>2</sup> | Adeq<br>Precision |
|------------|------|-------|------|--------|----------------|--------------------|---------------------|-------------------|
| Value      | 2.13 | 83.68 | 2.54 | 334.66 | 0.9697         | 0.9394             | 0.8398              | 15.0691           |

**Table S5.** Design and results of orthogonal experiments.

| Number         | Variable      |                |                              | Growth ratio |
|----------------|---------------|----------------|------------------------------|--------------|
|                | A<br>Daidzein | B<br>Lactulose | C<br>Probiotic microcapsules |              |
| 1              | 1             | 1              | 1                            | 1.092        |
| 2              | 2             | 2              | 1                            | 1.099        |
| 3              | 3             | 3              | 1                            | 1.350        |
| 4              | 3             | 2              | 2                            | 1.412        |
| 5              | 2             | 1              | 2                            | 1.402        |
| 6              | 1             | 3              | 2                            | 1.380        |
| 7              | 1             | 2              | 3                            | 1.074        |
| 8              | 2             | 3              | 3                            | 1.062        |
| 9              | 3             | 1              | 3                            | 1.023        |
| K <sub>1</sub> | 3.545         | 3.518          | 3.541                        |              |
| K <sub>2</sub> | 3.563         | 3.586          | 4.194                        |              |
| K <sub>3</sub> | 3.786         | 3.791          | 3.159                        |              |
| k <sub>1</sub> | 1.182         | 1.173          | 1.180                        |              |
| k <sub>2</sub> | 1.188         | 1.195          | 1.398                        |              |
| k <sub>3</sub> | 1.262         | 1.264          | 1.053                        |              |
| R              | 0.080         | 0.091          | 0.345                        |              |

**Table S6.** Contents of daidzein and equol in the fecal fermentation broth.

| Fecal flora                             | Daidzein concentration<br>( $\mu\text{g/mL}$ ) | Equol concentration<br>( $\mu\text{g/mL}$ ) | Equol/Daidzein | $\log_{10}$<br>(equol/daidzein) |
|-----------------------------------------|------------------------------------------------|---------------------------------------------|----------------|---------------------------------|
| low-equol-<br>producing<br>fecal flora  | 59.72                                          | 20.96                                       | 0.35           | -0.45                           |
| high-equol-<br>producing<br>fecal flora | 4.17                                           | 59.39                                       | 14.24          | 1.15                            |
